# Supplementary material for: Impact of Introducing Hepatitis B Birth Dose Vaccines into the Infant Immunization Program in Burkina Faso: Study Protocol for a Stepped Wedge Cluster Randomized Trial (NéoVac Study)
Source: MDPI journal article supplement (doi:10.3390/vaccines9060583), 2021-06-01
Supplement: s1 [file s1]

# LIVRET D'INFORMATION

## ÉTUDE NÉOVAC 2 AU BURKINA FASO

ÉVALUATION DE L'INTÉGRATION D'UNE DOSE NÉONATALE DE VACCIN CONTRE L'HÉPATITE B DANS LE CALENDRIER VACCINAL DES ENFANTS AU BURKINA FASO  
UNE MÉTHODE MIXTE COMPRENANT UN ESSAI COMMUNAUTAIRE, UNE ÉTUDE ANTHROPOLOGIQUE ET UNE ÉVALUATION ÉCONOMIQUE

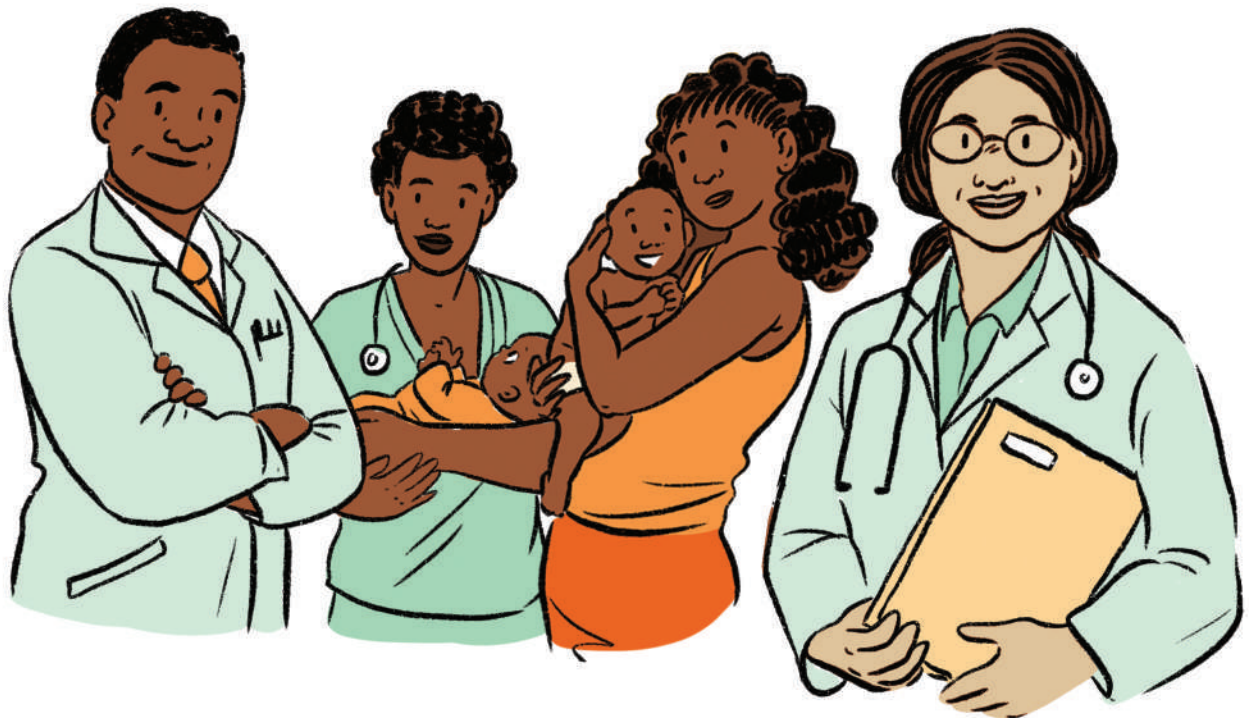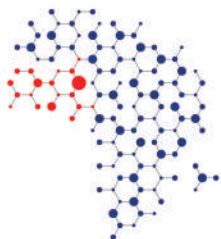

LAMIVAC

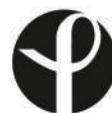

INSTITUT  
PASTEUR

# L'HÉPATITE B

L'hépatite B est un virus.  
Il est tellement petit qu'on ne peut pas le voir à l'œil nu,  
mais il peut se cacher dans le corps.

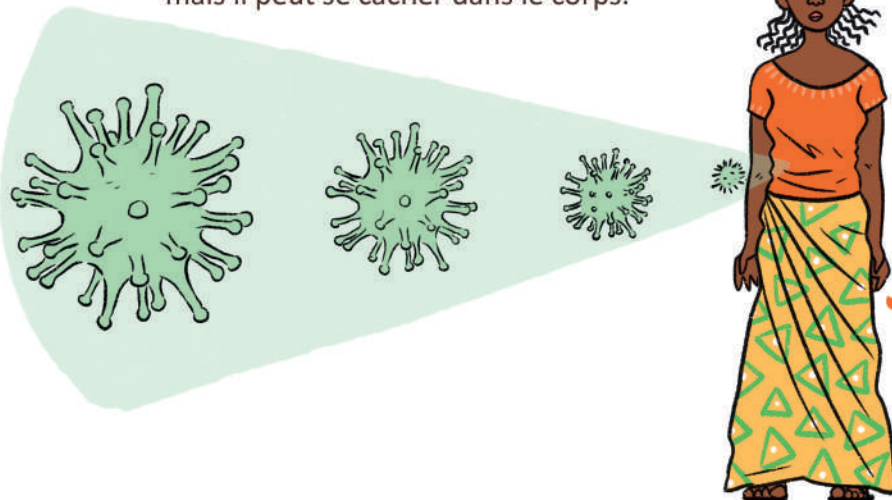

Dans la plupart  
des cas, on  
guérit tout seul.

Mais chez certaines  
personnes, avec le  
temps, il peut créer  
des maladies  
graves.

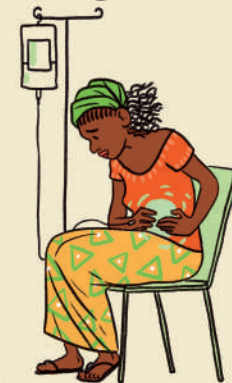

## HEUREUSEMENT, IL EXISTE UN VACCIN !

Dans l'environnement, il y a  
beaucoup de microbes qui  
peuvent rendre malade.

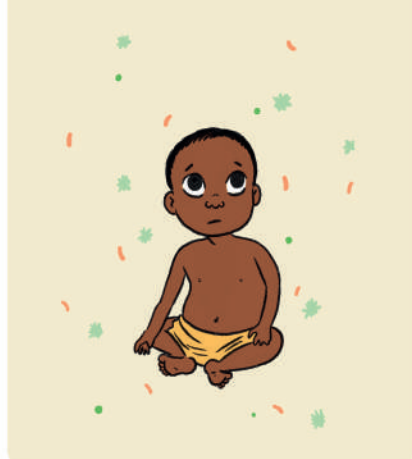

La vaccination protège  
le corps contre la maladie.

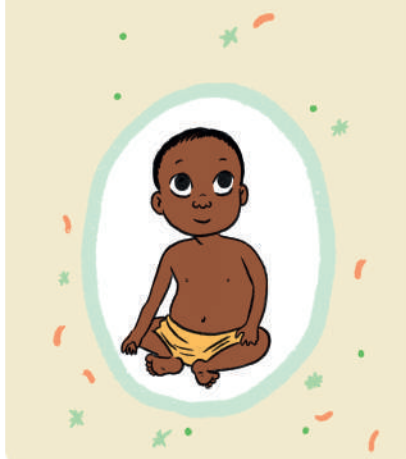

Une fois vacciné contre le  
virus, celui-ci ne peut plus  
nous rendre malade.

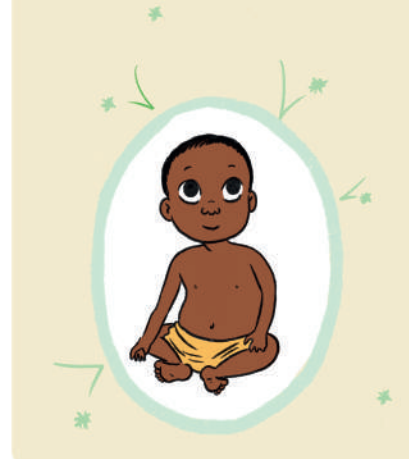

Pour l'instant, au Burkina Faso,  
la vaccination contre l'hépatite B  
début à l'âge de 8 semaines.

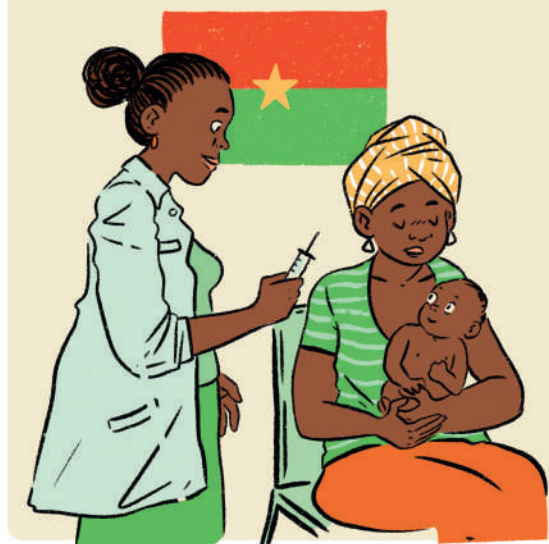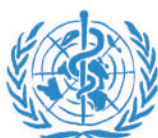

**L'Organisation  
Mondiale de la Santé**  
recommande de  
vacciner les enfants  
contre l'hépatite B à la  
naissance. Le vaccin est  
recommandé au Burkina  
Faso, mais pas encore  
mis en place.

ON VEUT TESTER LA VACCINATION  
À LA NAISSANCE AU BURKINA-FASO  
POUR VOIR SI ELLE PROTÈGE MIEUX  
LES BÉBÉS DES RISQUES DE  
CONTAMINATION.

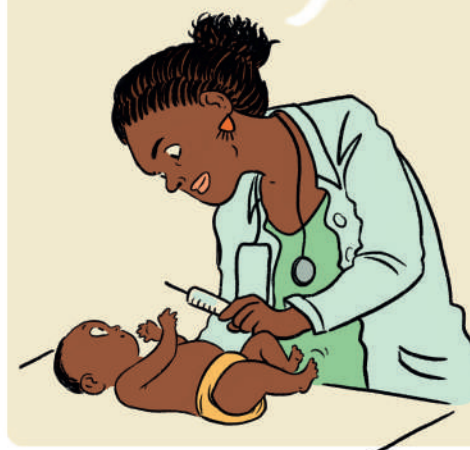



# OÙ ?

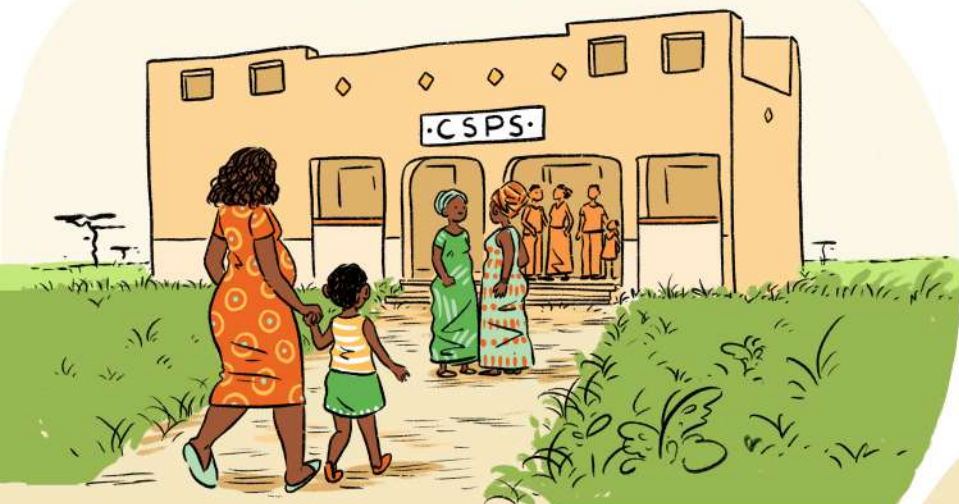

Chaque mois de nouveaux CSPS ruraux de Dafra et de Dô recevront le vaccin pour faire la vaccination à la naissance. À la fin de l'étude, tous le feront.

2 possibilités :

Votre CSPS **fait** la vaccination à la naissance, votre enfant pourra être vacciné.

Votre CSPS **ne fait pas** la vaccination à la naissance, votre enfant pourra être vacciné à 8 semaines.

# QUI ?

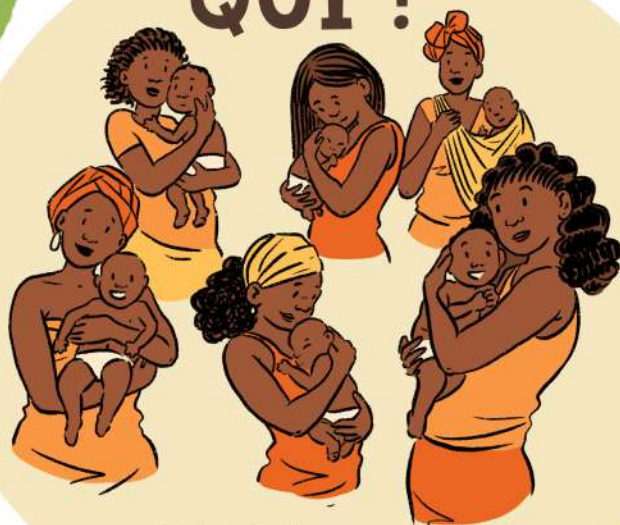

Toutes les femmes enceintes de Dô et Dafra qui accouchent dans les CSPS.

Visite prénatale

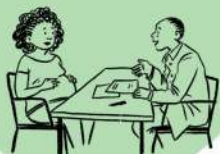

Accouchement

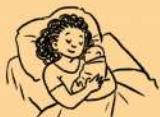

Si disponible, une dose de vaccin Hépatite B supplémentaire & Vaccination habituelle

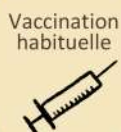

Vaccination habituelle

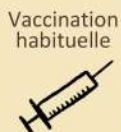

Vaccination habituelle

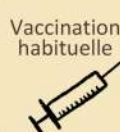

Vaccination habituelle

Test Hépatite B & vaccination habituelle

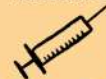

# PLANNING

La durée totale de votre participation sera d'environ 10 mois.

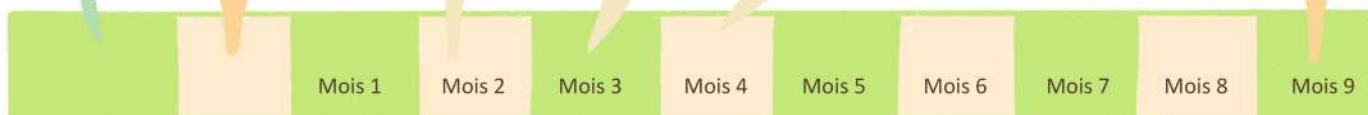



# QU'EST-CE QUE ÇA IMPLIQUE POUR MOI ET MON FUTUR ENFANT ?

## PREMIER TEMPS

questionnaire au CSPS

ÊTES-VOUS MARIÉE ?  
COMBIEN D'ACCOUCHEMENTS  
AVEZ-VOUS EUS DANS VOTRE VIE ?  
JUSQU'À QUEL ÂGE ÊTES-VOUS  
ALLÉE À L'ÉCOLE ?

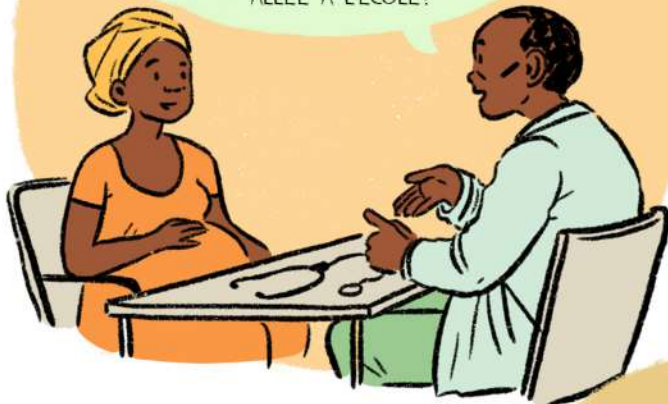

## SECOND TEMPS

accouchement dans  
le même CSPS

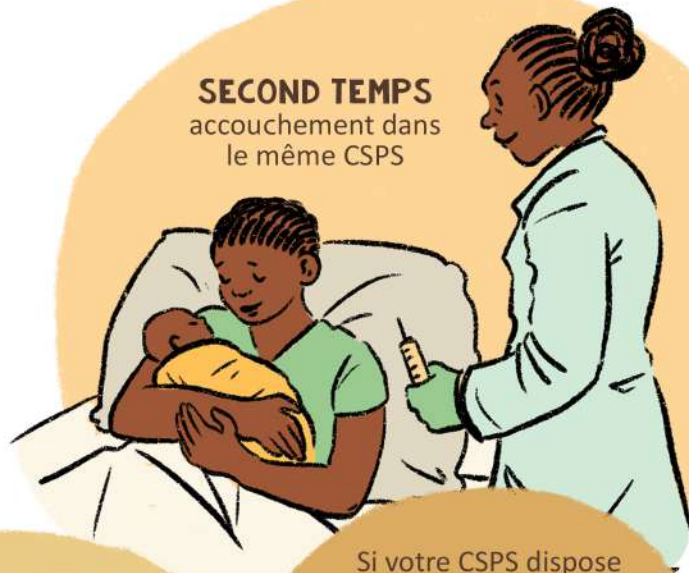

Si votre CSPS ne  
dispose pas de vaccins

↓  
Vaccination habituelle &  
Vaccination Hépatite B à  
2, 3 et 4 mois dans le cadre du  
Programme Elargi de  
Vaccination (PEV).

Si votre CSPS dispose  
des vaccins, et si vous avez  
accepté de participer  
à l'étude

↓  
Vaccination habituelle &  
Vaccination hépatite B  
dès la naissance.

## TROISIÈME TEMPS

prélèvement de sang  
et questionnaire

JE VAIS PRÉLEVER QUELQUES  
GOUTTES DE SANG AU BOUT DE  
VOTRE DOIGT ET DE CELUI DE VOTRE  
BÉBÉ POUR RÉALISER UN TEST DE  
DÉPISTAGE DE L'HÉPATITE B.

C'EST UN TEST RAPIDE,  
VOUS SEREZ IMMÉDIATEMENT  
INFORMÉE DU RÉSULTAT.

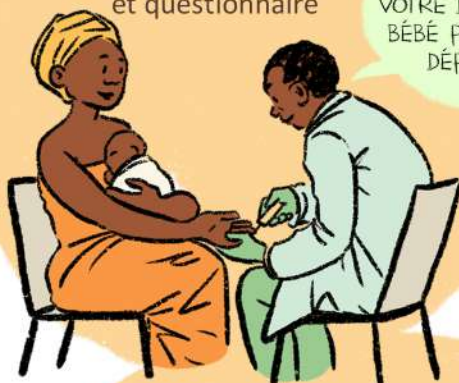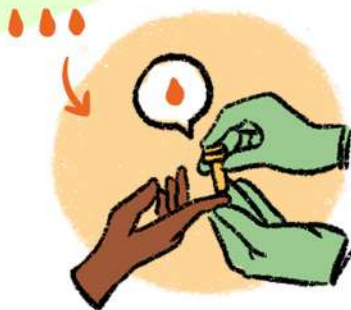

Si le résultat du test est POSITIF  
chez vous ou votre enfant (c'est rare),  
nous réaliserons alors une prise de sang  
pour des examens de laboratoire  
plus approfondis.

Si besoin de soins, vous  
serez pris en charge dans les  
meilleures conditions au Centre  
médical avec antenne  
chirurgicale.

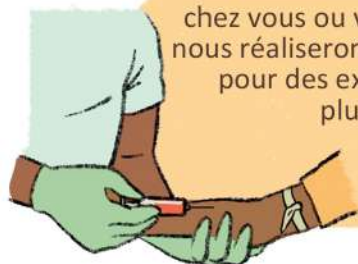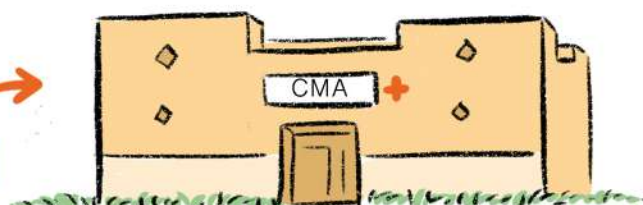



# BÉNÉFICES

Si le vaccin est mis en place dans votre CSPS,

Vaccination à la naissance.

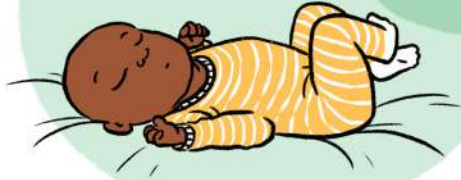

À 9 mois, test gratuit de l'hépatite B pour vous et votre enfant.

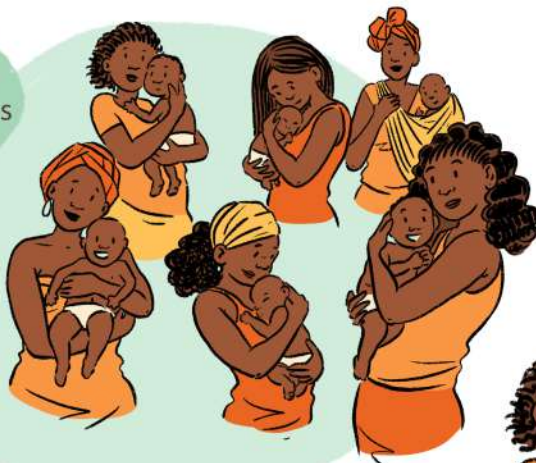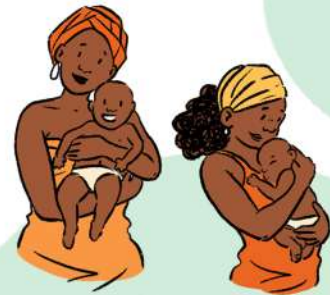

Si on est infecté et si un traitement est nécessaire, prise en charge pendant 2 ans.

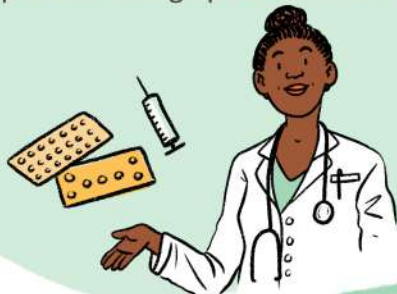

Si le test est négatif

Il est conseillé de réaliser un test pour savoir si vous avez déjà rencontré l'hépatite B et guéri toute seule. Si vous n'avez jamais été en contact avec le virus nous pourrions vous vacciner contre l'hépatite B.

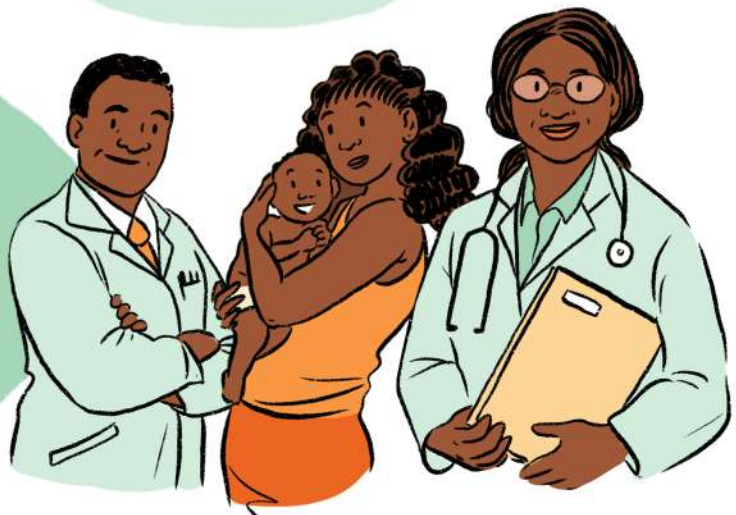

Aider la recherche pour :

Savoir si la stratégie de vaccination à la naissance est efficace pour prévenir les infections mère-enfant autour de la naissance.

Améliorer la santé publique au Burkina Faso et en Afrique.

# RISQUES

Parfois, dans les 24 heures après la vaccination :

- Douleur, rougeur au point d'injection
- Diarrhées ou vomissements
- Fièvre

Mais, en général, ces effets disparaissent rapidement.

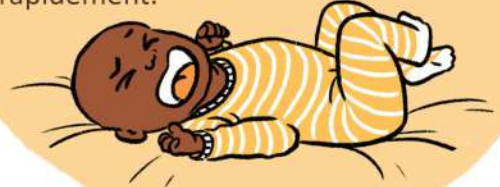

Très très rare (1 cas pour 1 million) : réaction allergique grave.



# VOS DROITS

Votre participation à cette étude est entièrement volontaire, c'est vous qui choisissez, rien ne vous oblige à y participer.

JE PEUX PRENDRE LE TEMPS DE RÉFLÉCHIR ET D'EN PARLER AVEC MA FAMILLE AVANT DE ME DÉCIDER. JE PEUX POSER TOUTES LES QUESTIONS QUE JE SOUHAITE.

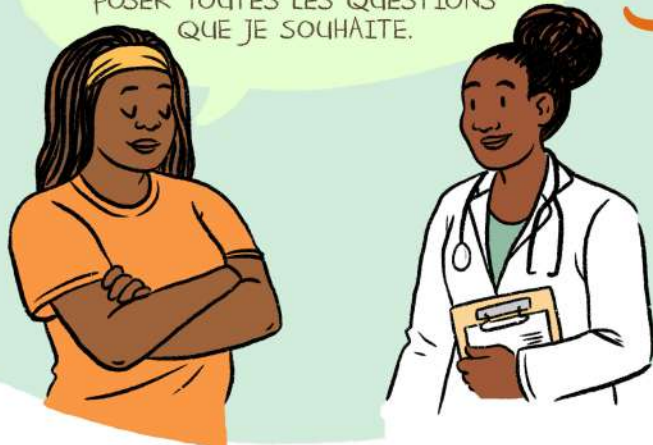

Et vous pouvez changer d'avis à tout moment, sans justifications.

JE PEUX DÉCIDER À TOUT MOMENT DE NE PLUS PARTICIPER À L'ÉTUDE

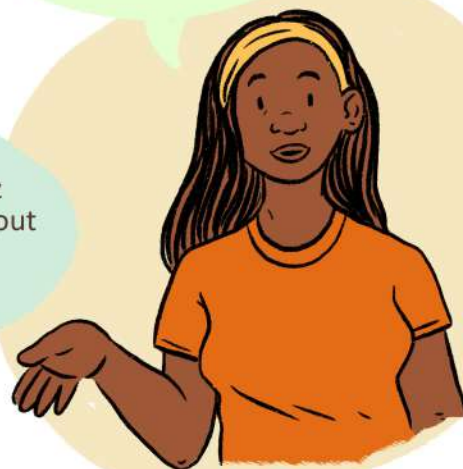

## CONFIDENTIALITÉ DES DONNÉES

VOTRE NOM NE SERA INDIQUÉ NULLE PART : VOS DONNÉES SERONT IDENTIFIÉES PAR UN NUMÉRO DE CODE QUI GARANTIRA LA PROTECTION DE VOS DONNÉES PERSONNELLES.

Les informations que vous donnerez et qui seront analysées resteront strictement confidentielles.

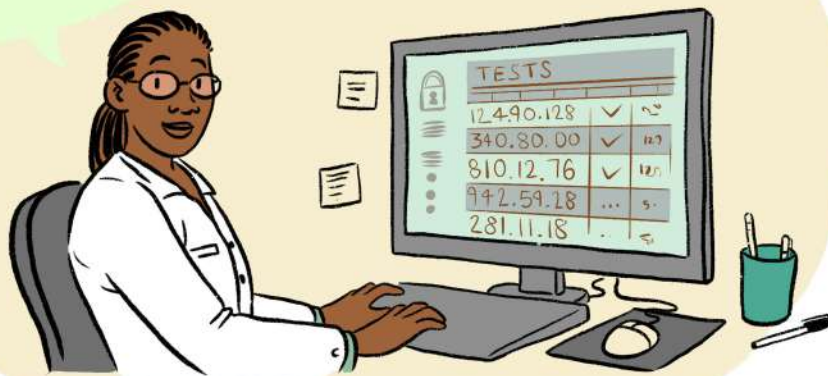

Si vous le souhaitez, vous pourrez être informée des résultats globaux de la recherche.

VOUS AVEZ LE DROIT DE CHOISIR SI LE SANG DE VOS ANALYSES PEUT ÊTRE GARDÉ POUR D'AUTRES RECHERCHES

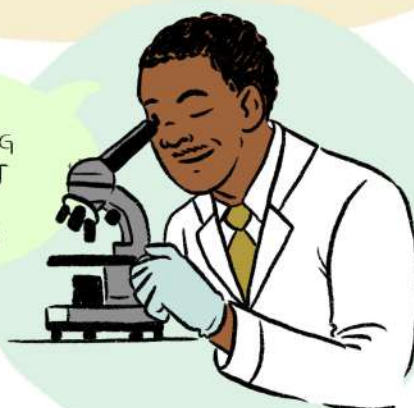

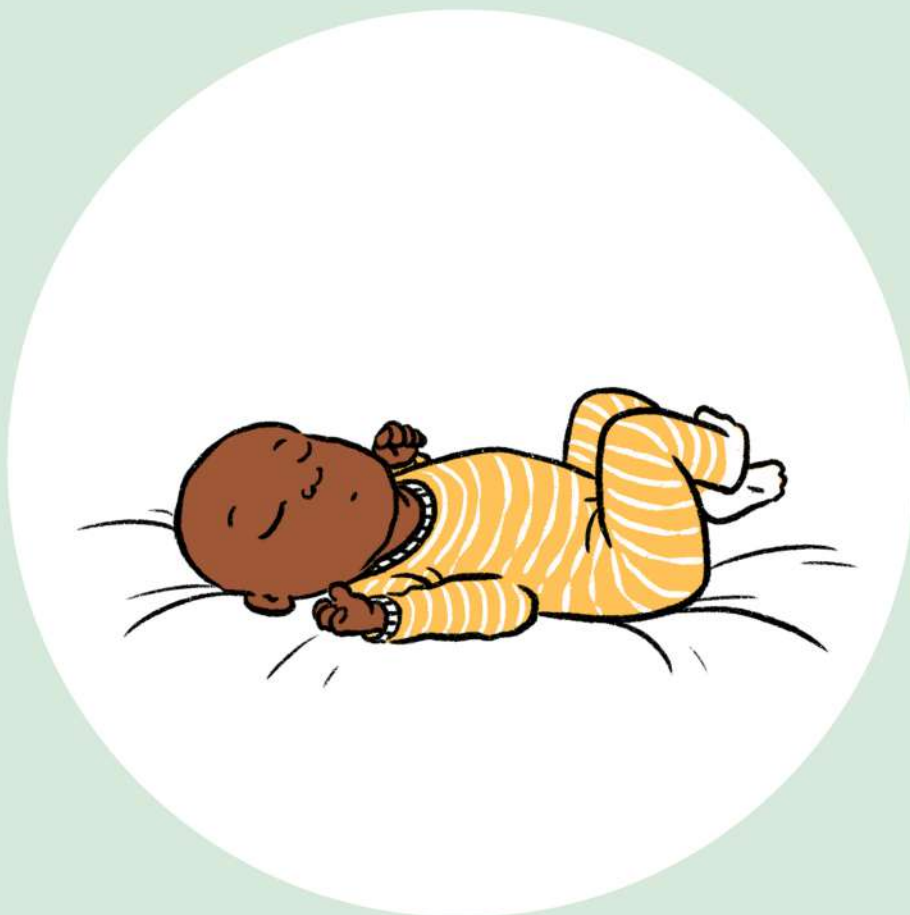

VOUS POUVEZ DEMANDER DES INFORMATIONS ET FAIRE VALOIR VOS DROITS AUPRES DE
