# Supplementary material for: Impact of Introducing Hepatitis B Birth Dose Vaccines into the Infant Immunization Program in Burkina Faso: Study Protocol for a Stepped Wedge Cluster Randomized Trial (NéoVac Study)
Source: MDPI journal article supplement (doi:10.3390/vaccines9060583), 2021-06-01
Supplement: s1 [file s1]

# Neovac Phase 2 - Burkina Faso

Evaluation de l'intégration d'une dose néonatale  
de vaccin contre l'hépatite B dans le calendrier  
vaccinal des enfants au Burkina Faso

## CAHIER D'OBSERVATION

Protocole d'étude N°2017-083 ; version 8F du 12 mars 2020

Identification de la mère : |\_|\_| - |\_|\_|\_|\_|

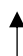

Code CSPS  
(cf. liste des codes  
à la page suivante)

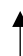

Numéro d'ordre de la  
participante  
(0001 pour la première  
inclusion dans chaque  
CSPS, etc.)

**Promoteur :**

Institut Pasteur  
25 rue du Docteur Roux  
75724 Paris Cedex 15

**Promoteur délégué:**

LAMIVAC  
Avenue Konaté, 01 BP 112, Bobo-Dioulasso  
+226 20 98 20 41

**Investigateurs principaux :**

Yusuke SHIMAKAWA (Institut Pasteur Paris)  
Unité d'épidémiologie des maladies émergentes  
tél. : +33 (0)1 40 61 38 87  
yusuke.shimakawa@pasteur.fr

**Investigateurs locaux :**

Abdoul TIENDREBEOGO (LAMIVAC)  
tél. : +226 71 12 05 06  
tiendraseric@gmail.com

Muriel VRAY (Institut Pasteur Paris)  
Unité d'épidémiologie des maladies émergentes  
tél. : +33 (0)1 40 61 39 58  
muriel.vray@pasteur.fr

Dramane KANIA (Centre Muraz)  
tél. : +226 70 74 89 13  
draka3703@yahoo.fr

Haoua TALL (AMP)  
tél. : +226 20 98 20 41  
htall@aamp.org

## Liste des codes des CSPS impliqués dans l'étude

| District | CSPS              | Code CSPS |
|----------|-------------------|-----------|
| Dafra    | Panamasso         | 01        |
|          | Kouentou          | 02        |
|          | Santidougou       | 03        |
|          | Léguema           | 04        |
|          | Kotédougou        | 05        |
|          | Yégueresso        | 06        |
|          | Baré              | 07        |
|          | Sogossagasso      | 08        |
| Do       | Kiri              | 09        |
|          | Peni              | 10        |
|          | Toussiana         | 11        |
|          | Tapoko            | 12        |
|          | Logofourousso     | 13        |
|          | Koumi             | 14        |
|          | Tiara             | 15        |
|          | Nasso             | 16        |
|          | Karangasso/Sambla | 17        |
|          | Bouende           | 18        |
|          | Matourkou         | 19        |
|          | Dodougou          | 20        |
|          | Kouakouale        | 21        |
|          | Gna fongon        | 22        |
|          | Moussobadougou    | 23        |
|          | Ouolokoto         | 24        |

## Instructions générales de remplissage

- ✓ Remplir les feuilles en utilisant un stylo à bille noir pour une bonne lisibilité.
- ✓ Ecrire en lettres capitales : 

|   |   |   |   |   |   |
|---|---|---|---|---|---|
| N | E | O | V | A | C |
|---|---|---|---|---|---|
- ✓ N'inscrire qu'un seul caractère par case et remplir toutes les cases : 

|   |   |
|---|---|
| 0 | 3 |
|---|---|

 , 

|   |   |
|---|---|
| 4 | 0 |
|---|---|

 kg
- ✓ Lorsque le résultat doit être reporté dans une case fermée, cochez la case appropriée :  
☒ Oui    ☐ Non
- ✓ Chaque erreur doit être barrée d'un trait, de manière à la laisser visible. La nouvelle donnée doit être écrite à côté en datant et paraphant. Ne pas utiliser de correcteur :  

|              |              |
|--------------|--------------|
| <del>3</del> | <del>6</del> |
|--------------|--------------|

 32 (LS le 01/01/2020)
- ✓ Si une date est totalement inconnue par la participante, merci de cocher « Ne sait pas ». Si une date partiellement connue, merci de remplir les cases manquantes avec la mention **XX** (par exemple, seule l'année est connue : XX/XX/2020 ou seul le jour est inconnu : XX/01/2020).
- ✓ En cas d'événement indésirable, quel que soit le moment de la déclaration, remplir le feuillet EI à la page 9 du cahier d'observation. Tous les événements indésirables graves (EIG) doivent être déclarés au promoteur via le formulaire de « déclaration des événements indésirables graves ».
- ✓ La fiche de « Bilan de fin d'étude » à la page 8 du cahier d'observation doit toujours être complétée à la fin du suivi, même si la mère et/ou l'enfant ne sont pas revenus à la visite des 9 mois.

## Critères d'inclusion

|                                                                                                                                                                                                                                                                                                                                                                                                                                                                                                                                   |
|-----------------------------------------------------------------------------------------------------------------------------------------------------------------------------------------------------------------------------------------------------------------------------------------------------------------------------------------------------------------------------------------------------------------------------------------------------------------------------------------------------------------------------------|
| 1. Date de visite :  _ _ / _ _ / _ _ _ _  (jj/mm/aaaa)                                                                                                                                                                                                                                                                                                                                                                                                                                                                            |
| 2. Type de visite : <input type="checkbox"/> <sub>1</sub> CPN <input type="checkbox"/> <sub>2</sub> Accouchement<br>↳ 2.1. Si « CPN », indiquez le n° de CPN :<br><input type="checkbox"/> <sub>1</sub> CPN 1 <input type="checkbox"/> <sub>2</sub> CPN 2 <input type="checkbox"/> <sub>3</sub> CPN 3 <input type="checkbox"/> <sub>4</sub> CPN 4 <input type="checkbox"/> <sub>5</sub> CPN 5 <input type="checkbox"/> <sub>6</sub> CPN 6 <input type="checkbox"/> <sub>7</sub> CPN 7 <input type="checkbox"/> <sub>8</sub> CPN 8 |
| 3. Nom du CSPS visité : _____                                                                                                                                                                                                                                                                                                                                                                                                                                                                                                     |
| 4. Clinicien / Agent de santé : _____                                                                                                                                                                                                                                                                                                                                                                                                                                                                                             |

| Critères d'inclusion                                                                                          |                                           |                                           |
|---------------------------------------------------------------------------------------------------------------|-------------------------------------------|-------------------------------------------|
| 5. Femme enceinte ou femme qui vient d'accoucher                                                              | <input type="checkbox"/> <sub>0</sub> Non | <input type="checkbox"/> <sub>1</sub> Oui |
| 6. Fréquentant un CSPS participant à l'étude pour une visite prénatale ou l'accouchement                      | <input type="checkbox"/> <sub>0</sub> Non | <input type="checkbox"/> <sub>1</sub> Oui |
| 7. Résidente dans les aires sanitaires couvertes par les CSPSs ruraux des districts sanitaires de Dafra ou Do | <input type="checkbox"/> <sub>0</sub> Non | <input type="checkbox"/> <sub>1</sub> Oui |
| 8. Formulaire de consentement éclairé signé après information de la femme                                     | <input type="checkbox"/> <sub>0</sub> Non | <input type="checkbox"/> <sub>1</sub> Oui |

↳ Si au moins l'un des critères est coché **NON**, la femme ne peut pas être incluse

| Critères de non inclusion                                                                                                                   |                                           |                                           |
|---------------------------------------------------------------------------------------------------------------------------------------------|-------------------------------------------|-------------------------------------------|
| 9. Participation à une autre recherche incompatible avec les modalités de protocole                                                         | <input type="checkbox"/> <sub>0</sub> Non | <input type="checkbox"/> <sub>1</sub> Oui |
| 10. Toute condition de l'enfant ou de la mère qui, selon le professionnel de santé, est incompatible avec les examens réalisés pour l'étude | <input type="checkbox"/> <sub>0</sub> Non | <input type="checkbox"/> <sub>1</sub> Oui |

↳ Si l'un des critères est coché **OUI**, la femme ne peut pas être incluse

| Résultat de l'inclusion                                                                                              |
|----------------------------------------------------------------------------------------------------------------------|
| 11. Femme incluse dans l'étude : <input type="checkbox"/> <sub>1</sub> Oui <input type="checkbox"/> <sub>0</sub> Non |

| Participation de la femme                                                                                                                                                                                                                                                            |
|--------------------------------------------------------------------------------------------------------------------------------------------------------------------------------------------------------------------------------------------------------------------------------------|
| 12. La femme a-t-elle déjà été incluse dans cette étude (NéoVac 2) pour une <b><u>grossesse précédente</u></b> :<br><input type="checkbox"/> <sub>0</sub> Non<br><input type="checkbox"/> <sub>1</sub> Oui<br>↳ 12.1. Si « Oui », indiquez son ancien identifiant :  _ _  -  _ _ _ _ |

## V1 – Visite d'inclusion

| Données sur la femme                                                                                                                                                                                                                                                                                                                             |
|--------------------------------------------------------------------------------------------------------------------------------------------------------------------------------------------------------------------------------------------------------------------------------------------------------------------------------------------------|
| 13. Village/hameau d'habitation : _____                                                                                                                                                                                                                                                                                                          |
| 14. CSPS de référence par rapport au village : _____                                                                                                                                                                                                                                                                                             |
| 15. N° d'ordre de la femme dans le registre de CPN :  _ _ _  /  _ _ _ _ <br>↳ 15.1. Si la femme a réalisé la/les CPN dans un autre CSPS, précisez le nom : _____                                                                                                                                                                                 |
| 16. Date de naissance :  _ _ / _ _ / _ _ _ _  (jj/mm/aaaa) <input type="checkbox"/> Ne sait pas<br>↳ 16.1. Si « Ne sait pas », précisez l'âge approximatif :  _ _  ans                                                                                                                                                                           |
| 17. Situation matrimoniale :<br><input type="checkbox"/> <sub>1</sub> Mariée monogame<br><input type="checkbox"/> <sub>2</sub> Mariée polygame<br><input type="checkbox"/> <sub>3</sub> Divorcée<br><input type="checkbox"/> <sub>4</sub> Célibataire<br><input type="checkbox"/> <sub>5</sub> Veuve                                             |
| 19. Ethnie :<br><input type="checkbox"/> <sub>1</sub> Bobo<br><input type="checkbox"/> <sub>2</sub> Tiéfo<br><input type="checkbox"/> <sub>3</sub> Mossi<br><input type="checkbox"/> <sub>4</sub> Dioula<br><input type="checkbox"/> <sub>5</sub> Peuhl<br><input type="checkbox"/> <sub>6</sub> Autre<br>↳ 19.1. Si « Autre », précisez : _____ |
| 20. Niveau d'instruction :<br><input type="checkbox"/> <sub>0</sub> N'a pas été à l'école<br><input type="checkbox"/> <sub>1</sub> Primaire<br><input type="checkbox"/> <sub>2</sub> Secondaire<br><input type="checkbox"/> <sub>3</sub> Supérieur                                                                                               |
| 21. Gestité (nombre total de grossesses antérieures + actuelle) :  _ _  ; <input type="checkbox"/> <sub>9</sub> Ne sait pas                                                                                                                                                                                                                      |
| 22. Parité (nombre total d'accouchements antérieurs) :  _ _  ; <input type="checkbox"/> <sub>9</sub> Ne sait pas                                                                                                                                                                                                                                 |
| 23. Date des dernières règles :  _ _ / _ _ / _ _ _ _  (jj/mm/aaaa) <input type="checkbox"/> Ne sait pas                                                                                                                                                                                                                                          |
| 24. Date probable d'accouchement :  _ _ / _ _ / _ _ _ _  (jj/mm/aaaa)<br><input type="checkbox"/> <sub>9</sub> Ne sait pas <input type="checkbox"/> <sub>8</sub> NA (pour les femmes qui sont incluses au moment de V2)                                                                                                                          |

## V2 – Visite d'accouchement ou post-accouchement

**Pour les enfants qui sont mort-nés ou décédés après la naissance, merci de compléter ce formulaire (V2), puis allez directement au formulaire « Bilan de fin d'étude » (p.8)**

25. Date de visite : |\_|\_|/|\_|\_|/|\_|\_|\_|\_| (jj/mm/aaaa)

26. Type de visite : ☐<sub>1</sub> Accouchement ☐<sub>2</sub> Consultation postnatale

27. Nom du CSPS visité : \_\_\_\_\_

28. Clinicien / Agent de santé : \_\_\_\_\_

### Données sur les consultations prénatales

29. Nombre total de consultations prénatales réalisées durant la grossesse : |\_| ; ☐<sub>9</sub> Ne sait pas **(Si « 0 » allez à Q.32, sinon allez à Q.30)**

30. Dépistage VIH lors d'une consultation prénatale :

- ☐<sub>0</sub> Fait et résultat négatif  
☐<sub>1</sub> Fait et résultat positif  
☐<sub>2</sub> Non fait  
☐<sub>9</sub> Ne sait pas

↳ 30.1. Si « Fait et résultat positif », est ce qu'un traitement antiviral a été initié durant la grossesse ?

- ☐<sub>1</sub> Oui  
☐<sub>0</sub> Non  
☐<sub>9</sub> Ne sait pas

↳ 30.1.1. Si « Oui », quand : |\_|\_|/|\_|\_|/|\_|\_|\_|\_| (jj/mm/aaaa) ☐<sub>9</sub> Ne sait pas

31. Dépistage VHB (l'hépatite B) lors d'une consultation prénatale :

- ☐<sub>0</sub> Fait et résultat négatif  
☐<sub>1</sub> Fait et résultat positif  
☐<sub>2</sub> Non fait  
☐<sub>9</sub> Ne sait pas

↳ 31.1. Si « Fait et résultat positif », est ce qu'un traitement antiviral a été initié durant la grossesse ?

- ☐<sub>1</sub> Oui  
☐<sub>0</sub> Non  
☐<sub>9</sub> Ne sait pas

↳ 31.1.1. Si « Oui », quand : |\_|\_|/|\_|\_|/|\_|\_|\_|\_| (jj/mm/aaaa) ☐<sub>9</sub> Ne sait pas

**Données sur l'accouchement**

32. Date de l'accouchement: |\_|\_|/|\_|\_|/|\_|\_|\_|\_| (jj/mm/aaaa)

33. Lieu de l'accouchement :

- ☐<sub>1</sub> Dans un CSPS (précisez le nom : \_\_\_\_\_  
et le n° d'ordre de la femme dans le registre d'accouchement : \_\_\_\_\_)
- ☐<sub>2</sub> Dans un CMA (précisez le nom : \_\_\_\_\_)
- ☐<sub>3</sub> Dans un CHU (précisez le nom : \_\_\_\_\_)
- ☐<sub>4</sub> Dans une structure privée (précisez le nom : \_\_\_\_\_)
- ☐<sub>5</sub> Au domicile de la femme
- ☐<sub>6</sub> Au domicile d'une autre personne
- ☐<sub>7</sub> Sur le lieu de travail de la femme
- ☐<sub>8</sub> Chez un tradipraticien (guérisseur)
- ☐<sub>9</sub> Chez une accoucheuse traditionnelle
- ☐<sub>10</sub> Sur la route vers une structure de santé
- ☐<sub>11</sub> Autre (précisez : \_\_\_\_\_)

34. Intervention réalisée durant l'accouchement :

- 34.1. Césarienne ☐<sub>0</sub> Non ☐<sub>1</sub> Oui ☐<sub>9</sub> Ne sait pas
- 34.2. Ventouse ☐<sub>0</sub> Non ☐<sub>1</sub> Oui ☐<sub>9</sub> Ne sait pas
- 34.3. Version ☐<sub>0</sub> Non ☐<sub>1</sub> Oui ☐<sub>9</sub> Ne sait pas
- 34.4. Episiotomie ☐<sub>0</sub> Non ☐<sub>1</sub> Oui ☐<sub>9</sub> Ne sait pas

35. Multiplicité :

- ☐<sub>1</sub> Simple
- ☐<sub>2</sub> Jumeaux
- ☐<sub>3</sub> Triplés

**Données sur le 1<sup>er</sup> enfant de cet accouchement (si plusieurs enfants sont nés au moment de l'accouchement, merci de compléter un ou plusieurs formulaires supplémentaires en fonction du nombre d'enfants et de les coller à la suite de ce cahier d'observation)**

36. Identifiant de l'enfant n°1 : |\_|\_| - |\_|\_|\_|\_| - 1

Identifiant de la mère

37. Heure de naissance : |\_|\_| H |\_|\_| (format 24h (E.G., 16h00)) ☐<sub>9</sub> Ne sait pas

38. Prématuré (avant 37 semaines révolues d'aménorrhée) :

- ☐<sub>1</sub> Oui
- ☐<sub>0</sub> Non
- ☐<sub>9</sub> Ne sait pas

39. L'enfant n°1 est-il mort-né ?

- ☐<sub>1</sub> Oui
- ☐<sub>0</sub> Non

**Si « Oui » allez directement au formulaire « Bilan de fin d'étude » (page 8)**

40. Poids de naissance : |\_|\_|\_|\_| g

41. Taille de naissance : |\_|\_| , |\_| cm

|          |                                           |
|----------|-------------------------------------------|
| NEOVAC 2 | Identifiant de la mère :  _ _  -  _ _ _ _ |
|----------|-------------------------------------------|

|                                                                                                                                                                                                                                                                                                                                                                                                                                                                                                                                                                                                                                                                                                                                                                                                                                                          |
|----------------------------------------------------------------------------------------------------------------------------------------------------------------------------------------------------------------------------------------------------------------------------------------------------------------------------------------------------------------------------------------------------------------------------------------------------------------------------------------------------------------------------------------------------------------------------------------------------------------------------------------------------------------------------------------------------------------------------------------------------------------------------------------------------------------------------------------------------------|
| 42. Périmètre crânien :  _ _  ,  _  cm                                                                                                                                                                                                                                                                                                                                                                                                                                                                                                                                                                                                                                                                                                                                                                                                                   |
| 43. Périmètre thoracique :  _ _  ,  _  cm                                                                                                                                                                                                                                                                                                                                                                                                                                                                                                                                                                                                                                                                                                                                                                                                                |
| 44. Sexe de l'enfant :<br><input type="checkbox"/> <sub>1</sub> Masculin<br><input type="checkbox"/> <sub>2</sub> Féminin                                                                                                                                                                                                                                                                                                                                                                                                                                                                                                                                                                                                                                                                                                                                |
| 45. APGAR : 1 min :  _ _  5 min :  _ _  10 min :  _ _  <input type="checkbox"/> <sub>1</sub> NA                                                                                                                                                                                                                                                                                                                                                                                                                                                                                                                                                                                                                                                                                                                                                          |
| <b>Données sur l'intervention (vaccination à la naissance contre l'hépatite B)</b>                                                                                                                                                                                                                                                                                                                                                                                                                                                                                                                                                                                                                                                                                                                                                                       |
| 46. L'injection du vaccin contre l'hépatite B à la naissance a-t-elle eu lieu pour l'enfant n°1 ?<br><input type="checkbox"/> <sub>1</sub> Oui<br>↳ Si « Oui », précisez :<br>46.1.1. Date de l'injection :  _ _ / _ _ / _ _ _ _  (jj/mm/aaaa)<br>46.1.2. Heure de l'injection :  _ _  H  _ _ <br>46.1.3. Numéro du lot :  _ _ _ _ _ _ _ _ _ _ <br><br><input type="checkbox"/> <sub>0</sub> Non<br>↳ 46.2.1. Si « Non », pourquoi ?<br><input type="checkbox"/> <sub>1</sub> Le vaccin n'était pas disponible dans le CSPS<br><input type="checkbox"/> <sub>2</sub> L'enfant est revenu après 8 semaines de vie<br><input type="checkbox"/> <sub>3</sub> Refus de vacciner<br>↳ 46.2.1.1. Si « Refus de vacciner », qui a refusé ? _____<br>_____<br><input type="checkbox"/> <sub>4</sub> Autre<br>↳ 46.2.1.2. Si « Autre », précisez : _____<br>_____ |
| 47. L'enfant n°1 a-t-il reçu des traitements depuis la naissance ?<br><input type="checkbox"/> <sub>1</sub> Oui<br><input type="checkbox"/> <sub>0</sub> Non<br><br><b><u>Si « Oui », merci de compléter le formulaire des traitements concomitants (page 10)</u></b>                                                                                                                                                                                                                                                                                                                                                                                                                                                                                                                                                                                    |

### V3 - Visite de dépistage du couple mère-enfant

**Pour les enfants qui sont décédés, merci de compléter les questions Q.51 à Q.53 de ce formulaire (V3), puis allez directement au formulaire « Bilan de fin d'étude » (p.8)**

|                                                         |
|---------------------------------------------------------|
| 48. Date de visite :  _ _ / _ _ / _ _ _ _  (jj/mm/aaaa) |
| 49. Nom du CSPS visité : _____                          |
| 50. Clinicien / Agent de santé : _____                  |

#### Données à 9 mois sur le 1<sup>er</sup> enfant de l'accouchement

#### 51. Vaccination du 1<sup>er</sup> enfant de l'accouchement (cf. carnet/carte de vaccination de l'enfant)

| Age              | Vaccin          | Vaccination                                                                                                                              | Date (jj/mm/aaaa)   |
|------------------|-----------------|------------------------------------------------------------------------------------------------------------------------------------------|---------------------|
| Dès la naissance | HepB 0          | <input type="checkbox"/> <sub>1</sub> Oui <input type="checkbox"/> <sub>0</sub> Non<br><input type="checkbox"/> <sub>9</sub> Ne sait pas | _ _ / _ _ / _ _ _ _ |
|                  | VPO 0           | <input type="checkbox"/> <sub>1</sub> Oui <input type="checkbox"/> <sub>0</sub> Non<br><input type="checkbox"/> <sub>9</sub> Ne sait pas | _ _ / _ _ / _ _ _ _ |
|                  | BCG             | <input type="checkbox"/> <sub>1</sub> Oui <input type="checkbox"/> <sub>0</sub> Non<br><input type="checkbox"/> <sub>9</sub> Ne sait pas | _ _ / _ _ / _ _ _ _ |
| 2 mois           | Penta 1         | <input type="checkbox"/> <sub>1</sub> Oui <input type="checkbox"/> <sub>0</sub> Non<br><input type="checkbox"/> <sub>9</sub> Ne sait pas | _ _ / _ _ / _ _ _ _ |
|                  | VPO 1 (Polio 1) | <input type="checkbox"/> <sub>1</sub> Oui <input type="checkbox"/> <sub>0</sub> Non<br><input type="checkbox"/> <sub>9</sub> Ne sait pas | _ _ / _ _ / _ _ _ _ |
|                  | Pneumo 1        | <input type="checkbox"/> <sub>1</sub> Oui <input type="checkbox"/> <sub>0</sub> Non<br><input type="checkbox"/> <sub>9</sub> Ne sait pas | _ _ / _ _ / _ _ _ _ |
|                  | Rota 1          | <input type="checkbox"/> <sub>1</sub> Oui <input type="checkbox"/> <sub>0</sub> Non<br><input type="checkbox"/> <sub>9</sub> Ne sait pas | _ _ / _ _ / _ _ _ _ |
| 3 mois           | Penta 2         | <input type="checkbox"/> <sub>1</sub> Oui <input type="checkbox"/> <sub>0</sub> Non<br><input type="checkbox"/> <sub>9</sub> Ne sait pas | _ _ / _ _ / _ _ _ _ |
|                  | VPO 2 (Polio 2) | <input type="checkbox"/> <sub>1</sub> Oui <input type="checkbox"/> <sub>0</sub> Non<br><input type="checkbox"/> <sub>9</sub> Ne sait pas | _ _ / _ _ / _ _ _ _ |
|                  | Pneumo 2        | <input type="checkbox"/> <sub>1</sub> Oui <input type="checkbox"/> <sub>0</sub> Non<br><input type="checkbox"/> <sub>9</sub> Ne sait pas | _ _ / _ _ / _ _ _ _ |
|                  | Rota 2          | <input type="checkbox"/> <sub>1</sub> Oui <input type="checkbox"/> <sub>0</sub> Non<br><input type="checkbox"/> <sub>9</sub> Ne sait pas | _ _ / _ _ / _ _ _ _ |
| 4 mois           | Penta 3         | <input type="checkbox"/> <sub>1</sub> Oui <input type="checkbox"/> <sub>0</sub> Non<br><input type="checkbox"/> <sub>9</sub> Ne sait pas | _ _ / _ _ / _ _ _ _ |
|                  | VPO 3 (Polio 3) | <input type="checkbox"/> <sub>1</sub> Oui <input type="checkbox"/> <sub>0</sub> Non<br><input type="checkbox"/> <sub>9</sub> Ne sait pas | _ _ / _ _ / _ _ _ _ |
|                  | Pneumo 3        | <input type="checkbox"/> <sub>1</sub> Oui <input type="checkbox"/> <sub>0</sub> Non<br><input type="checkbox"/> <sub>9</sub> Ne sait pas | _ _ / _ _ / _ _ _ _ |
|                  | Rota 3          | <input type="checkbox"/> <sub>1</sub> Oui <input type="checkbox"/> <sub>0</sub> Non<br><input type="checkbox"/> <sub>9</sub> Ne sait pas | _ _ / _ _ / _ _ _ _ |
|                  | VPI             | <input type="checkbox"/> <sub>1</sub> Oui <input type="checkbox"/> <sub>0</sub> Non<br><input type="checkbox"/> <sub>9</sub> Ne sait pas | _ _ / _ _ / _ _ _ _ |



**Dépistage AgHBs des couples mère-enfant**

52. Résultat du test rapide AgHBs **pour la mère biologique** : (si le résultat est indéterminé, merci de refaire le test jusqu'à ce que le résultat apparaisse)

☐<sub>0</sub> Négatif

☐<sub>1</sub> Positif

↳ Si « Positif », précisez :

52.1. Prélèvement veineux de 8 mL sur tube sec effectué : ☐<sub>1</sub> Oui ☐<sub>0</sub> Non

52.2. Date de rendez-vous au CMA : |\_|\_|/|\_|\_|/|\_|\_|\_|\_| (jj/mm/aaaa)

53. La collection sur papier buvard a-t-elle été réalisée **pour la mère biologique** ?

☐<sub>1</sub> Oui

☐<sub>0</sub> Non

↳ 53.1. Si « Non », pourquoi :

\_\_\_\_\_

\_\_\_\_\_

54. Résultat du test rapide AgHBs **pour le 1<sup>er</sup> enfant** : (si le résultat est indéterminé, merci de refaire le test jusqu'à ce que le résultat apparaisse)

☐<sub>0</sub> Négatif

☐<sub>1</sub> Positif

↳ Si « Positif », précisez :

54.1. Prélèvement veineux de 4 mL sur tube sec effectué : ☐<sub>1</sub> Oui ☐<sub>0</sub> Non

54.2. Date de rendez-vous au CMA : |\_|\_|/|\_|\_|/|\_|\_|\_|\_| (jj/mm/aaaa)

55. La collection sur papier buvard a-t-elle été réalisée **pour le 1<sup>er</sup> enfant** ?

☐<sub>1</sub> Oui

☐<sub>0</sub> Non

↳ 55.1. Si « Non », pourquoi :

\_\_\_\_\_

\_\_\_\_\_

**Événements indésirables**

56. Des événements indésirables sont-ils survenus pour la mère ou l'enfant n°1 depuis la naissance de l'enfant ?

☐<sub>1</sub> Oui

☐<sub>0</sub> Non

**Si « Oui », merci de compléter le formulaire des événements indésirables (page 9)**

**Traitements concomitants**

57. Des traitements concomitants ont-ils été reçus par la mère ou l'enfant n°1 depuis la naissance de l'enfant ?

☐<sub>1</sub> Oui

☐<sub>0</sub> Non

**Si « Oui », merci de compléter le formulaire des traitements concomitants (page 10)**

## Bilan fin d'étude

### Condition fin d'étude

58. Toutes les visites ont été effectuées pour la mère et l'enfant n°1 :

☐<sub>1</sub> Oui

☐<sub>0</sub> Non

↳ 58.1. Si « Non », pourquoi :

☐<sub>1</sub> Enfant n°1 décédé

↳ 58.1.1.1. Condition du décès ☐<sub>1</sub> Fausse couche

☐<sub>2</sub> Mort-né

☐<sub>3</sub> Décédé après la naissance

↳ 58.1.1.2. Date de décès : |\_|\_|/|\_|\_|/|\_|\_|\_|\_| (jj/mm/aaaa) ☐<sub>9</sub> Ne sait pas

↳ 58.1.1.3. Convocation de la mère pour prélèvement : ☐<sub>1</sub> Oui ☐<sub>0</sub> Non

↳ 58.1.1.4. La mère a-t-elle été prélevée : ☐<sub>1</sub> Oui ☐<sub>0</sub> Non

**Si la mère a été prélevée, merci de compléter les questions Q.52 et Q.53 à la page 7**

☐<sub>2</sub> Mère décédée

↳ 58.1.2.1. Date de décès : |\_|\_|/|\_|\_|/|\_|\_|\_|\_| (jj/mm/aaaa) ☐<sub>9</sub> Ne sait pas

↳ 58.1.2.2. L'enfant a-t-il été convoqué pour le prélèvement : ☐<sub>1</sub> Oui ☐<sub>0</sub> Non

↳ 58.1.2.3. L'enfant a-t-il été prélevé : ☐<sub>1</sub> Oui ☐<sub>0</sub> Non

**Si l'enfant a été prélevé, merci de compléter les questions Q.54 et Q.55 à la page 7**

☐<sub>3</sub> Autre

↳ 58.1.3. Si « Autre », précisez :

☐<sub>1</sub> Refus

↳ 58.1.3.1. Qui a refusé ? \_\_\_\_\_

↳ 58.1.3.2. Précisez la raison du refus : \_\_\_\_\_

↳ 58.1.3.3. Autorisation de conserver les données collectées sur le couple mère-enfant pour l'analyse de l'étude ? ☐<sub>1</sub> Oui ☐<sub>0</sub> Non

☐<sub>2</sub> Déménagement

☐<sub>3</sub> Autre

↳ 58.1.3.4. Si « Autre », précisez : \_\_\_\_\_

☐<sub>4</sub> Aucune information concernant la mère (perdue de vue)

## Événement indésirable

| Événement | Personne concernée                                     | Date de survenue | Intensité                       | Action                                                                                                                  | Evolution                                                                            | Imputabilité                                     | Date de fin | E.I. grave (**) |
|-----------|--------------------------------------------------------|------------------|---------------------------------|-------------------------------------------------------------------------------------------------------------------------|--------------------------------------------------------------------------------------|--------------------------------------------------|-------------|-----------------|
|           | 0=Mère<br>1=Enfant n°1<br>2=Enfant n°2<br>3=Enfant n°3 | JJ/MM/AAAA       | 1=Faible<br>2=Moyenne<br>3=Fort | 1=Aucune<br>2=Traitement(s) symptomatique(s) seul(s) (*)<br>3=Hospitalisation (**)<br>4=Autre (préciser en commentaire) | 1=Guérison<br>2=Non encore rétabli<br>3=Séquelles (**)<br>4=Décès (**)<br>5=Inconnue | 0=Non lié à la recherche<br>1=Lié à la recherche | JJ/MM/AAAA  | 0=Non<br>1=Oui  |
| 1.        | _                                                      | _/_/_/_          | _                               | _                                                                                                                       | _                                                                                    | _                                                | _/_/_/_     | _               |
| 2.        | _                                                      | _/_/_/_          | _                               | _                                                                                                                       | _                                                                                    | _                                                | _/_/_/_     | _               |
| 3.        | _                                                      | _/_/_/_          | _                               | _                                                                                                                       | _                                                                                    | _                                                | _/_/_/_     | _               |
| 4.        | _                                                      | _/_/_/_          | _                               | _                                                                                                                       | _                                                                                    | _                                                | _/_/_/_     | _               |
| 5.        | _                                                      | _/_/_/_          | _                               | _                                                                                                                       | _                                                                                    | _                                                | _/_/_/_     | _               |
| 6.        | _                                                      | _/_/_/_          | _                               | _                                                                                                                       | _                                                                                    | _                                                | _/_/_/_     | _               |
| 7.        | _                                                      | _/_/_/_          | _                               | _                                                                                                                       | _                                                                                    | _                                                | _/_/_/_     | _               |
| 8.        | _                                                      | _/_/_/_          | _                               | _                                                                                                                       | _                                                                                    | _                                                | _/_/_/_     | _               |
| 9.        | _                                                      | _/_/_/_          | _                               | _                                                                                                                       | _                                                                                    | _                                                | _/_/_/_     | _               |
| 10.       | _                                                      | _/_/_/_          | _                               | _                                                                                                                       | _                                                                                    | _                                                | _/_/_/_     | _               |

(\*) En cas de traitement(s) symptomatique(s), compléter la page des traitements concomitants.

(\*\*) En cas d'événements indésirables grave, prévenir immédiatement l'ARC du LAMIVAC par téléphone au 72 23 92 85/71 12 05 06 ou par email [fsawadogo@aamp.org](mailto:fsawadogo@aamp.org) au moyen du formulaire de « déclaration des événements indésirables graves ».

## Traitement concomitant

| Nom générique ou commercial | Personne concernée                                     | Date de début | Posologie | Voie                                                                                                         | Indication | Date de fin |
|-----------------------------|--------------------------------------------------------|---------------|-----------|--------------------------------------------------------------------------------------------------------------|------------|-------------|
|                             | 0=Mère<br>1=Enfant n°1<br>2=Enfant n°2<br>3=Enfant n°3 | JJ/MM/AAAA    |           | 1=Orale<br>2=Intramusculaire<br>3=Intraveineuse<br>4=Sous cutanée<br>5=Transdermique<br>6=Rectale<br>7=Autre |            | JJ/MM/AAAA  |
| 1.                          | _                                                      | --/--/----    |           | _                                                                                                            |            | --/--/----  |
| 2.                          | _                                                      | --/--/----    |           | _                                                                                                            |            | --/--/----  |
| 3.                          | _                                                      | --/--/----    |           | _                                                                                                            |            | --/--/----  |
| 4.                          | _                                                      | --/--/----    |           | _                                                                                                            |            | --/--/----  |
| 5.                          | _                                                      | --/--/----    |           | _                                                                                                            |            | --/--/----  |
| 6.                          | _                                                      | --/--/----    |           | _                                                                                                            |            | --/--/----  |
| 7.                          | _                                                      | --/--/----    |           | _                                                                                                            |            | --/--/----  |
| 8.                          | _                                                      | --/--/----    |           | _                                                                                                            |            | --/--/----  |
| 9.                          | _                                                      | --/--/----    |           | _                                                                                                            |            | --/--/----  |
| 10.                         | _                                                      | --/--/----    |           | _                                                                                                            |            | --/--/----  |
| 11.                         | _                                                      | --/--/----    |           | _                                                                                                            |            | --/--/----  |
| 12.                         | _                                                      | --/--/----    |           | _                                                                                                            |            | --/--/----  |
